Oxidative stress inducing agents' copper and alloxan accelerate cell cycle re-entering of somatic plant cells in the presence of suboptimal exogenous auxin.

Running title: Stress-induced agents in combination with optimal auxin induce non-canonical way of protection against stress.

Taras Pasternak

*Institute of Plant Biology, Biological Research Centre, Hungarian Academy of Sciences,  
Temesvári krt. 62., H-6726, Szeged, P.O. Box 521, H-6701, Szeged, Hungary*

*Present address: Institute of Biologie II, Ludwig-Albert University,  
Sonnerstr 5, 79104, Freiburg, Germany  
[taras.p.pasternak@gmail.com](mailto:taras.p.pasternak@gmail.com)*

---

## Abstract

The physiological status of differentiated somatic plant cells and kinetics of re-entering in cell cycle were investigated in the case of *Medicago sativa* leaf protoplasts after the application of oxidative stress-inducing agents. Excess copper (30  $\mu$ M) and alloxan (0.5 mM) accelerated cell cycle re-entry at an exogenous auxin concentration that alone was insufficient to induce cell activation. Application of stress-inducing agents accelerated changes in the nuclei landscape with further faster re-entry in DNA replication and cytokinesis. This acceleration was accompanied by a lower level of reactive oxygen species (ROS) accumulations. At later stages, stress-agents treated cells resemble stem cells in planta with a smaller size, higher cell viability, lower ROS level, and lower activities of major ROS scavenging enzymes. A similar cellular response could be achieved by increasing the exogenous auxin concentration. Based on these experimental results, it is suggested that sublethal stress treatments evoke a transient cell state that accelerates cellular reprogramming. We also speculate that this transient cell state serves as an effective mechanism for protection against oxidative stress.

---

# 1. Introduction

Environmental stresses induced by pollutants or other factors can negatively affect plant growth and development. In majorities of the cases, such adverse conditions alter the metabolism of reactive oxygen species resulted in it over accumulations [1].

Oxidative stress is defined as a significant imbalance between the generation of ROS and cellular antioxidant cascade activities what lead to a steady-state increase in ROS accumulation and potential damage of the cellular structure [2]. ROS scavenging capacities in planta were dependent on cell types, cell status, and communication between cells. Investigating the effect of stress-induced agents on different cell types and mechanisms of protection on cellular levels is required.

In particular, mesophyll protoplasts, alfalfa leaf protoplast-derived cells, provide an excellent experimental system to study plant cell physiology, including stress-response, de novo cell cycle re-activation and developmental transition [3].

ROS is a key factor in plant stress physiology. ROS are involved in the regulation of numerous cellular processes in plant cells and serve as essential components of many signal transduction pathways [4]. One such process is differentiation/re-activation of somatic plant cells [5], [6]. The importance of ROS generation for plant development was confirmed by experiments where inhibition of ROS generation with DPI (diphenyleneiodonium) or scavenging  $H_2O_2$  by DMTU (dimethylthiourea) inhibited cell cycle activation and plant growth [5]. Similar observations were also reported for animal cells: ROS generation was a trigger to a re-programmed somatic cell to pluripotent cells [7]. In our previous works, we found that combination of low concentration of exogenous auxin with external stressors (either iron, nitric oxide, or paraquat) induced the activation of “embryogenic-type” of cell division in alfalfa leaf protoplasts [8] [5] [9]. However, specific effects of these stressors still not clear and require further clarification. Copper (Cu) is an essential micronutrient for all plant species (Marschner 1995). Namely, copper is a key structural and catalytic component of a large number of proteins, a cofactor in many enzymes, transcription factors and protein interaction domains as Cu/Zn SOD, plastocyanin, ATPase, COPT, etc. (for review see [10], [11]). Copper is also involved in regulating cell wall lignification and ascorbic acid metabolism [12]. Recently it has been found that copper plays a role in epigenetic regulation [13]. Optimal Cu concentration in plant cell culture media

is in the range of 0.2-0.5  $\mu\text{M}$  ([14] vs [15]). Besides these functions as a nutrient, copper is a crucial redox-active agent in biological systems as an integral component of several electron transport chains as reductive and oxidative in chloroplasts and mitochondria, correspondingly. Copper plays a dual role in redox regulation [16]: as an integral constituent of Cu/Zn-superoxide dismutase (Cu/Zn-SOD) Cu involves in detoxification of superoxide radicals. However, excess copper eventually leads to the generation of a high amount of ROS through the Fenton reaction [17]. This oxidative burst event has been investigated in detail after applications of excess copper (100  $\mu\text{M}$ ) to tobacco BY2 cells [18]. Those cells, which are not able to effectively scavenge ROS have permanent oxidative stress. Numerous publications reported the inhibitory effect of copper on cell cycle progression in animal/human and plant cells. In thymus and spleen cells, 25  $\mu\text{M}$  copper increased the size of the sub-population of G0/G1 cells, what the result of inhibition of cell cycle progression [19] was. Similarly, copper caused cell cycle arrest in liver cells [20]. In the root meristem of *Allium cepa*, copper (8  $\mu\text{M}$ ) inhibited the cell cycle progression [21]. In *Arabidopsis* plants, 25  $\mu\text{M}$  copper prevented root apical meristem development but induced lateral root formation [22]. Interestingly, the effect of excess copper on shoot development was much less pronounced. The last paper suggests a possible involvement of the copper in de novo cell cycle activation. It fits well with [6], who demonstrated that 30  $\mu\text{M}$  copper-induced cell cycle re-entry of stationary phase cultured *Medicago* cells. Alloxan is another potential inducer of  $\text{H}_2\text{O}_2$  generation in animal and plant cells [23] [24] [25] [26] [27]. Application of alloxan to *Arabidopsis* seedlings inhibited the growth of the main root but promoted lateral root induction [25]. However, the direct effect of alloxan on cell cycle in plants has not been investigated yet. Majority of investigations of connections between cell cycle progression and ROS were performed either on cell suspension [28] or on whole plant level [21] when cell cycle progression is dependent from redistribution of phytohormone auxin [29]. Much less attention has been paid on an investigation of the link between cell physiological status, chromatin accessibility, and cell cycle activation during cell reprogramming.

In the current study, we investigated how oxidative stress-inducing agents' copper and alloxan interact with suboptimal exogenous auxin influencing chromatin accessibility, cell cycle activation/progression, and ROS generation/scavenging in plant cells at different stages of cell cycle re-entering. Our hypothesis is that non-lethal dose of stress agents induced only very transient ROS accumulation, which may trigger physiological processes including ROS

76 scavenging, cell cycle activation, and induction of autonomous development  
77 dependent on auxin concentrations.

78 Our observations revealed that copper/alloxan in combination with ex-  
79 ogenous auxin-induced rapid activation of ROS scavenging activity prevents  
80 ROS accumulation, and activated cellular re-programming, starting with  
81 chromatin relaxation. Stress treatment-induced formation of small, densely  
82 cytoplasmic cells with lower vacuolar pH. This cell type has a high develop-  
83 mental potency and is considered to have embryogenic competence [8] Fehér  
84 et al. 2003, [9].

85 The observation that these cells after prolong incubation have lower ROS  
86 level and lower antioxidant enzyme activities (including lower level of ascor-  
87 bate and glutathione) to compare with cells cultured without stress-agents  
88 suggests that cells in this developmentally competent transient cell state  
89 are protected from oxidative damage due to the prevention of ROS genera-  
90 tion/accumulation beside the activity of ROS scavenging.

## 91 2. Materials and Methods

### 92 2.1. Protoplasts cultures

93 Protoplasts were isolated from 4–6-weeks-old alfalfa (*Medicago sativa* L.  
94 ssp. *varia*; embryogenic genotype A2) plants grown in vitro as described else-  
95 where (Pasternak et al. 2000, 2002). Purified protoplasts were washed twice  
96 with W5 solution and re-suspended at a cell density of 105 protoplasts/ml  
97 in a modified K75 medium supplemented with 0.4 M glucose, 0.1 M man-  
98 nitol, and the appropriate growth regulators and stress agents. Copper as  
99  $\text{CuSO}_4 \cdot 5\text{H}_2\text{O}$  and alloxan (A4713 Sigma-Aldrich) at appropriate given con-  
100 centrations were added before medium sterilization by filtration. Stress treat-  
101 ments were applied from the beginning of protoplast culture. All treatments  
102 were carried out at 6 biological replicates for Cu and 5 for alloxan.

### 103 2.2. Determination of cell cycle kinetics and viability

104 Cell viability was determined with Evan's blue [30]. The frequency of cells  
105 that already passed through their first cell division was determined by micro-  
106 scopical observations inspecting at least 500 cells per sample. For the deter-  
107 mination of the number of cells that passed the DNA replication phase, cells  
108 were cultured in the presence of 10  $\mu\text{M}$  of 5-bromo-2'-deoxyuridine (BrdU;  
109 Amersham Biosciences, Vienna, Austria), added at 12 h after starting the  
110 culture. Samples were taken at the indicated time points. Immunological

111 detection of BrdU in isolated nuclei was carried out using standard proto-  
112 cols (Amersham Biosciences, Vienna, Austria), as described previously in  
113 detail [31] [8]. DNA stainability was detected by flow cytometry. Briefly, nu-  
114 clei were isolated from the cells fixed in Galbraith buffer [32] containing 2%  
115 formaldehyde for 30 minutes. Nuclei were washed twice with buffer, stained  
116 with 5 mg/l propidium iodide, and separated on a fluorescence-activated cell  
117 sorter (FACS) machine with constant running parameters [9]. The position  
118 of the peak in flow cytometry reflected DNA stainability (amount of dye that  
119 can bind to open sites of DNA).

### 120 *2.3. Hydrogen peroxide measurement*

121 The determination of the concentration of hydrogen peroxide released  
122 from the cells per 1 h was done according to [5]. The rate of cellular  $H_2O_2$   
123 was expressed as  $\mu\text{mol } H_2O_2$  from  $10^6$  viable cells per hour.

### 124 *2.4. Protein extraction and enzyme activity determination*

125 For protein isolation, cells were frozen in liquid nitrogen and stored at  
126  $-70^\circ\text{C}$  until analysis. Frozen samples were ground in a minimal volume of  
127 ice-cold extraction buffer containing 100 mM sodium phosphate (pH 7.0), 5  
128 mM ascorbate (only in the case of APX), 1 mM EDTA, 1 mM PMSF, 2 mM 2-  
129 mercaptoethanol and 1 mM leupeptin. Extracts were centrifuged for 15 min.  
130 at 14,000 g at  $4^\circ\text{C}$ . The supernatant was collected and protein concentration  
131 was determined using the Bio-Rad protein assay kit (BIORAD, Hercules,  
132 USA) and bovine serum albumin as a standard. Ascorbate peroxidase (APX;  
133 EC 1.11.1.11) activity was determined spectrophotometrically by monitoring  
134 the decrease in absorbance at 290 nm in 1 ml reaction mixture, containing  
135 50 mM potassium phosphate buffer (pH 7.0), 0.5 mM ascorbate, 0.1 mM  
136  $H_2O_2$ , 0.1 mM EDTA and 10  $\mu\text{g}$  protein [33]. A calibration curve was made  
137 measuring the absorbance of the reaction mixture (without extract) with  
138 5–200  $\mu\text{M}$  ascorbate. Catalase (CAT; EC 1.11.1.6) activity was determined  
139 by monitoring the decomposition of  $H_2O_2$  at 240 nm in 1 ml reaction mixture,  
140 containing 66 mM potassium phosphate buffer (pH 7.0), 12.5 mM  $H_2O_2$   
141 and 10  $\mu\text{g}$  protein [34] and defined as  $\text{OD}_{240}/\mu\text{g protein/min}$ . The enzyme  
142 activities measured right after protoplast isolation were highly variable from  
143 experiment to experiment likely due to slight differences in conditions of  
144 the explants and isolation procedures. That is why the relative changes in  
145 enzyme activities were calculated and are shown using the initial values (after  
146 protoplasts isolation) as reference 1.

## 147 2.5. Vacuolar pH determination

148 The pH-sensitive fluorescent dye FDA (Sigma) was dissolved in dimethyl  
149 sulfoxide at the concentrations of 2 mM. For dye loading, small aliquots of  
150 the cells (approximately 200  $\mu$ L of culture) were transferred to 1.5-mL re-  
151 action tubes, and the appropriate amount of the dye to final concentration  
152 2  $\mu$ M was added. Cells were gently transferred to microscopic slides with a  
153 jacket and cover with a coverslip. Fluorescence was measured after 10 min  
154 after loading. Fluorescent signals were detected by a fluorescent microscope  
155 (Axiovert 135 M; Zeiss). For ratiometric pH measurements, the excitation  
156 was at 440 and 490 nm. Fluorescence passing through a 515-nm dichroic  
157 mirror and 540 nm bandpass filter was recorded with a CCD camera. A  
158 25% transmittance neutral density filter was used between the light source  
159 and the filter to decrease excitation energy and minimize photo-bleaching.  
160 Excitation time was kept to 0.125 s to minimize dye bleaching. In this case,  
161 photobleaching of the dyes represented less than 5% of fluorescence per ob-  
162 servation/scan. Autofluorescence represented less than 1% of the total signal  
163 from dye-loaded protoplasts and did not change with time or experimental  
164 treatment. Background fluorescence intensity (together with dark camera  
165 level) was measured based on the average background signal from each indi-  
166 vidual image from an area next to the samples and was subtracted from the  
167 fluorescent intensity of the cells. The arithmetic operation was used to dis-  
168 tinguish the pH-dependent fluorescence obtained at 470 nm excitation from  
169 the pH-independent fluorescence obtained at 440 nm excitation.

## 170 2.6. Data analysis and statistics

171 All experiments were carried out in five independent biological repetitions.  
172 Statistical analyses of data were performed by either T-tests (comparison  
173 single points) or one way ANOVA using Microsoft Excel software.

## 174 3. Results

### 175 3.1. Effect of protoplasts isolation procedure on cell physiology

176 First, it was investigated how the procedure of protoplast isolation af-  
177 fected the physiological status of the mesophyll cells. We have found that  
178 incubation of the leaf segments in the enzyme solution and all washing steps  
179 led to a significant reduction in antioxidant enzyme activities (APX and  
180 POD) (Fig. 1). This, in turn, led to the rise of  $H_2O_2$  level in the cells im-  
181 mediately after isolation.

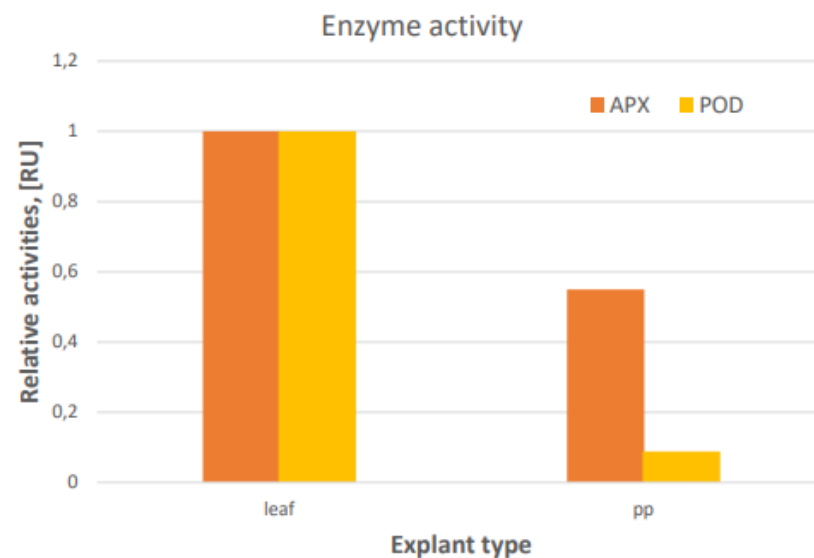

Figure 1: Effect of protoplasts isolation procedure on activity of antioxidant enzymes.

### 182 3.2. Copper application accelerates cell cycle re-activation in an auxin-depend- 183 ent manner

184 Copper (30  $\mu$ M) has been applied to freshly isolated Medicago leaf proto-  
185 plasts in combination with two different concentrations of the auxin (2,4-D):  
186 0.05 mg/l (appr. 220 nM) and 0.2 mg/l (appr. 880 nM). In both treatments,  
187 extra copper had a significant effect on several cellular features, including  
188 DNA stainability and cell cycle progression (Fig. 2). Copper, combined with  
189 exogenous auxin, increased DNA stainability (Fig. 2a), which means the  
190 amount of propidium iodide which can bind to DNA, indicating that the  
191 chromatin was in a more accessible status (Pasternak et al., 2000). The pos-  
192 itive effect of the copper on DNA stainability was followed by more rapid  
193 re-entering in DNA replication that was detected as the ratio of the cells in-  
194 corporating BrDU into their DNA during a given incubation period (Fig. 2b).  
195 Correspondingly, the number of cells, which passed cytokinesis at 96 hours  
196 was also higher in the presence of copper (Fig. 2c).

197 Next, it was asked whether the application of copper resulted in oxidative  
198 stress. To clarify this point, we measured the  $H_2O_2$  level, the activities of  
199 key antioxidant enzymes, and cell viability. It was found that the  $H_2O_2$  level  
200 was significantly lower in the case of copper application (Fig. 3a) at all time  
201 points likely because of higher APX activities as detected after 12 and 36



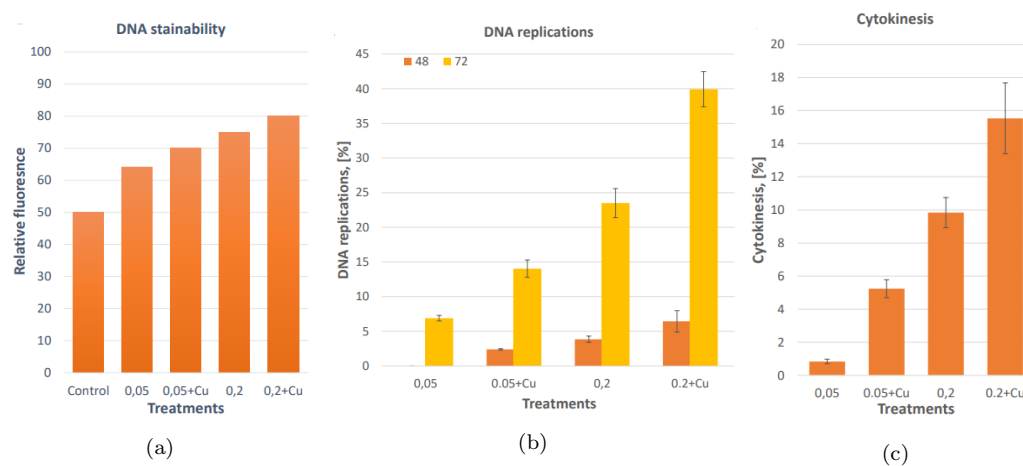

Figure 2: Effect of the copper on cell cycle reactivation. *Medicago* leaf protoplasts were cultured on the medium contain 0,05 and 0,2 mg/l (0,25  $\mu$ M and 1  $\mu$ M) 2,4-D with and without 30  $\mu$ M Cu added as  $\text{CuSO}_4$ . (a) - position of the G0/G1 peak on the nuclei histogram. Nuclei were isolated from cells after corresponding treatments. Nuclei were stained with propidium iodide and subjected to run on flow cytometer. Position of the peak corresponding to 2C DNA contents were determined (Y-axis). Control is nuclei from freshly isolated protoplasts; (b) - percent of the cells what pass DNA replications at given time point. BrdU was added at 12 hours after culture start, cells were fixed at given time points and BrdU was detected with specific antibody. Number of BrdU positive cells were divided to total number of cells in the population; (c) - percent of the cells what pass cytokinesis at 96 hours after isolation.

hours of cultivation Fig. 3c. However, after 96 hours of cultivation in the presence of copper, higher APX/CAT activities were detected only under 0.05 mg/l 2,4-D, but not under 0.2 mg/l 2,4-D.

Cell viability was detected as the uptake of Evans Blue correlated with the  $\text{H}_2\text{O}_2$  level and was significantly higher in the case of copper applications (Fig. 3). Interestingly, under 2 mg/l 2,4-D viability was similar as in the case of 0.2 mg/l 2,4-D supplemented with 30  $\mu$ M Cu.

Copper also had a significant impact on cell morphology in an auxin-dependent manner - it resulted in the formation of small, densely cytoplasmic cells with small storage vacuoles and compact nuclei. (Fig. 4a, Fig. A.9). These features characterize the cells which grow in the presence of 8.8  $\mu$ M 2,4,-D and exhibit embryogenic potency [8].



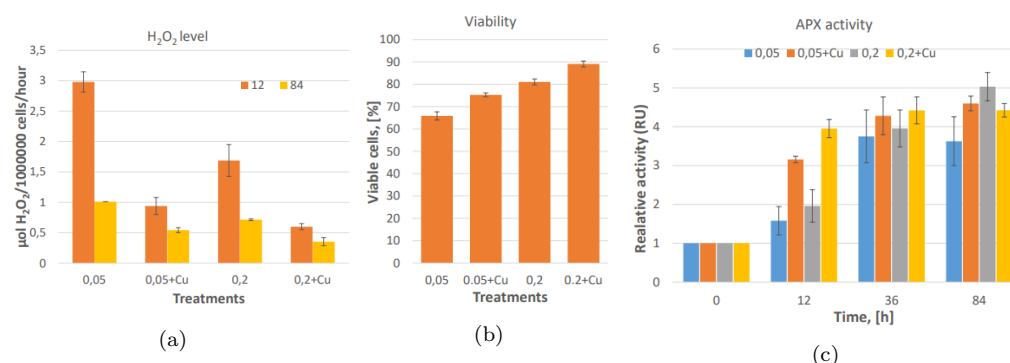

Figure 3: Effect of Cu on ROS accumulation, cell viability and APX activities. (a) - amount of non-scavenging  $H_2O_2$  realizing to the culture medium; (b) - cell viability determined by Evans Blue; (c) - total APX activities.

### 3.3. Alloxan promotes cell cycle re-entering and the formation of compact cells

Since copper can be considering as an essential nutrient, we used another stress-induced agent - alloxan - to prove the general role of stress application in cell cycle reactivation.

As it is shown on Fig. 5, application of 0.5 mM alloxan had similar effects on cell activation and morphology as 30  $\mu$ M copper: it accelerated chromatin relaxation as indicated by the volume of nuclei and nucleoli (Fig. 5a Fig. 5b), increased the ratio of the cells passing DNA replication and cytokinesis (Fig. 5c Fig. 5d). Higher cell viability (??), what was observed after 96 hours of cultivation, was accompanied by lower  $H_2O_2$  accumulation (Fig. 6b) and lower activities of the key ROS-scavenging enzymes (APX, Fig. 6c), POD, catalase. Significantly smaller cells were formed (Fig. 6d, Fig. A.8) characterized by lower vacuolar pH (Fig. A.9).

Altogether, one can conclude that there was a general similarity between the two stress-inducing agents concerning their effect on protoplasts growing in the presence of suboptimal auxin concentration.

### 3.4. Stress pre-treated cells require suboptimal auxin concentration for further microcolony growth

Since cells after stress-treatments have features of stem-like cells in planta, which are semi-autonomous ea. do not require endogenous hormones, we

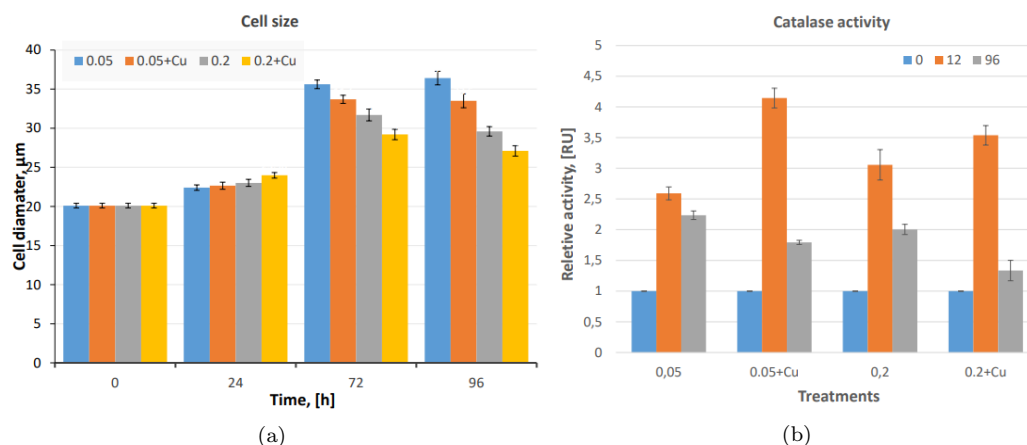

Figure 4: Effect of copper on cell expansion and catalase activity. (a) - cell size; (b) - catalase activity. Activity shown in relative units with activity in fresh protoplasts as 1 unit.

checked the possibility of whether cultured stress after stress-treatment became relatively independent from exogenous auxin. After 96 hours in the culture, cells were washed from stress-induced agents embedded in alginate and cultured in the presence of very low auxin concentration. It was shown that cell after alloxan/Cu treatment were able to develop further as a compact globular colony, while cell from the control cannot (Fig. A.10).

## 4. Discussion

### 4.1. Stress-inducing agents can promote cell cycle re-entering

Excess copper can be considered a stress-inducing agent, which may lead to slow-down cell cycle progression rate as frequently observed in stressed plant cells (for review: [35]). In accordance, in both plant and animal cells, stress was reported to inhibit cell cycle progression [28] [36]. However, [22] demonstrated that copper, while inhibited cell cycle progression in the main root apical meristem, induced de novo lateral root induction (de novo cell cycle activation). Similarly, alloxan in *Arabidopsis* inhibited main root growth but induced lateral root induction [25]. This raised the possibility that the application of stress-induced agents has a different effect on cell cycle progression and cell cycle induction, respectively. Copper was shown to increase the activity of the cell-cycle-regulatory cyclin-dependent-kinase (CDK) complex during the re-activation of stationary phase cell cultures [6]. In the copper

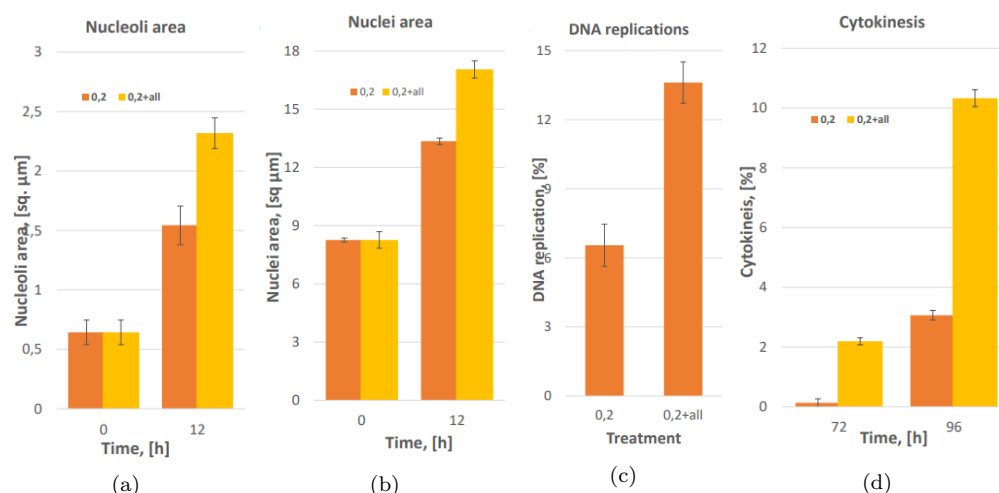

Figure 5: Effect of alloxan on nuclei morphology and cell cycle progression. (a) - nucleoli area; (b) - nuclei area; (c) - percent of the cells what pass DNA replications after 60 h; (d) - percent of the cells what pass cytokinesis at 72 and 96 hours after isolation.

255 moss *Scopelophila cataractae* copper mediates auxin signaling to control cell  
256 differentiation [37].

257 Physical access to DNA is a highly dynamic property of chromatin that  
258 plays an essential role in establishing and maintaining cell activity [38]. In  
259 differentiated somatic cells, cell activity is very restricted mainly to photo-  
260 synthesis. That's why the conversion of these cells to cell cycle active requires  
261 significant chromatin re-organization. The ability of DNA assessment can be  
262 quantified by measure the amount of dye that can be binding to nuclear DNA.  
263 Here we demonstrated that two stress-inducing agents (copper and alloxan)  
264 in the presence of the external auxin were able to accelerate chromatin re-  
265 laxation. This was reflected by higher DNA stainability and a rapid increase  
266 in nuclei/nucleoli size. Interestingly this effect mimics that of higher auxin  
267 concentration. It fits well with the finding that stress can increase internal  
268 auxin concentration in the cells [8]. This statement also fits well with the  
269 recent finding that copper increased auxin contents in maize [39]. We asked  
270 the next question: does excess copper and alloxan-induced oxidative stress  
271 (accumulation of excess reactive oxygen species)? In order to determine the  
272 level of oxidative stress, the rate of excess  $H_2O_2$  and the activities of the main  
273 enzymatic  $H_2O_2$  scavengers, ascorbate peroxidase, and catalase (for review  
274 [40]) were determined in protoplasts-derived cells at different time-points af-

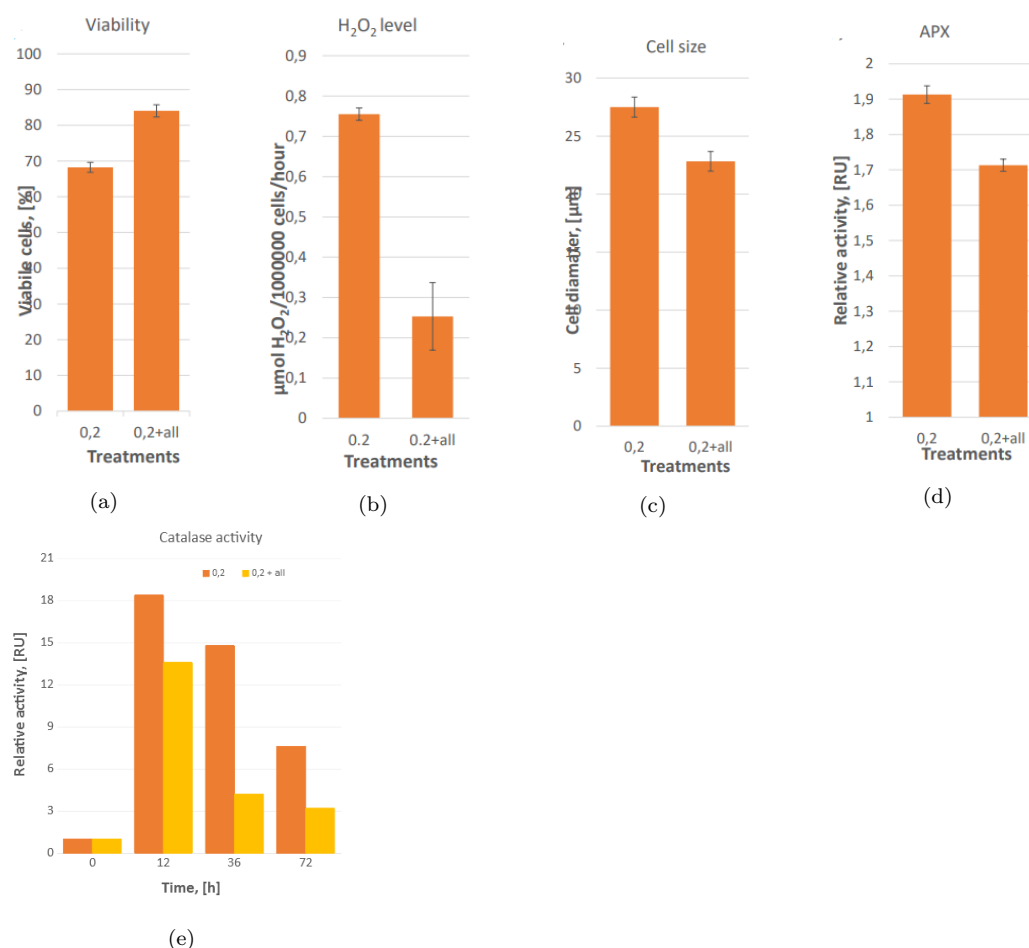

Figure 6: Effect of alloxan on viability,  $H_2O_2$  level and antioxidant enzymes activities. (a) - cell viability after 96 h; (b) -  $H_2O_2$  level after 96h; (c) - cell size after 96h; (d) - APX activity after 96 h; (e) - catalase activity kinetics during cultivation

275 ter stress-agent applications. The amount of  $H_2O_2$  released into the medium,  
 276 spatially and temporally separated from the sites of its production, reflects  
 277 the amount of  $H_2O_2$ , which could not be scavenged by the antioxidant system  
 278 (ROS-scavenging enzymes and low molecular weight antioxidants) in the cells  
 279 [5]. We demonstrated that treatment with copper and alloxan does not in-  
 280 duce the higher accumulation of  $H_2O_2$  to compare with corresponding control  
 281 because of higher ROS-scavenging activities. It means that stress-agents in-  
 282 duced acceleration of changes in chromatin structure (size and stainability of

nuclei) (Fig. 2a, Fig. 5a, Fig. 5b) and cell cycle progression (DNA-replication and mitosis) accompanied by less  $H_2O_2$  accumulation to compare with the corresponding control cells.

The lower level of  $H_2O_2$  may be related either to higher scavenging or lower production rate. Therefore, we analyzed the activity of main scavenging enzyme activities and have found that the lower  $H_2O_2$  accumulation level in stress-agents treated cells correlated well with higher APX, POD and CAT activities after 12 and 36 hours. Interestingly, after 96 hours of lower  $H_2O_2$  level in stress-agents treated cells in combination with 0.05 mg/l 2,4-D correlated with higher ROS scavenging system activities, while in combination with 0.2 mg/l 2,4-D with lower scavenging capacity. This phenomenon can be explained by the lower level of ROS generation in stem-like cell types. Stem-like cells in planta were characterized by small size because of small protein storage vacuole. In our hand, both copper and alloxan treatment led to the formation of similar vacuole type with higher vacuolar pH as in the non-treated cells. This phenomenon linked well with the finding of [41], who showed that copper negatively regulated V-ATPase activity and reduced vacuolar pH and vacuolar size in yeast. Next, we analyzed the sites of ROS generation/scavenging. There are two main ROS scavenging enzymes in plant cells: catalase (CAT), abundant in peroxisomes, and several isoforms of APX (ascorbate peroxidase) localize in chloroplasts and the cytoplasm. We found that after an initial break of the activity of both enzymes during protoplast isolation, there was a switch from chloroplastic to cytoplasmic APX (and general downregulation of CAT activity. The switch from CAT- to APX-activity has been described previously in protoplast-derived cells of grape [42]. Our finding also confirmed the results of [43] that  $H_2O_2$  level declined in tobacco protoplasts after cell re-programming but remained high in the grapevine protoplasts, which did not re-program. Type of cell division on the medium with 0.2 mg/l 2,4-D plus copper/alloxan exhibited features of stem-like meristematic cells in planta: exceedingly small size, small storage vacuoles, and no functional chloroplasts. In contrast, cells which were not exposed to stress factors had large size, bigger not-fused chloroplasts, and a large vacuole and can resemble non-stem meristem cells in planta. Cells in SAM/buds in planta can initiate new organs, and they serve as auxin source through internal auxin synthesis. Given the cell similarity between stem cells in planta and cells after copper/alloxan treatments, we ask questions about the hormonal-independence of these cells and the possibility of further morphogenesis. Our results demonstrated that short-term stress application

321 induced morphogenic potential of the cells, which were able to further pro-  
322 liferate to compact globular colony (Fig. A.10).

323 The above results demonstrated that stress-inducing agents copper and  
324 alloxan (in combination with suboptimal auxin concentration) accelerated  
325 chromatin relaxation and, in this way, accelerated cell cycle progression.  
326 Moreover, the application of stress-inducing agents did not induce ROS ac-  
327 cumulation accompanied by rapid activation of the ROS scavenging system  
328 or, at the later stage, by the reduction in ROS generation. The second op-  
329 tion can be considered as a non-canonical way of protection against stress by  
330 inducing relatively dormant stem-like cells that in planta can be resembled  
331 by dormant bud. On the contrary, cells that do not get auxin or have only  
332 low auxin can possess a canonical way of protection by scavenging ROS.

## 333 5. Conclusions

334 Our study demonstrated that:

- 335 1. Application of stress-induced agents in combination with suboptimal  
336 auxin concentration accelerated chromatin relaxation in mesophyll pro-  
337 toplast-derived cells;
- 338 2. Application of stress-inducing agents in non-lethal dose in combination  
339 with the amount of external auxin that is suboptimal to support cell  
340 division led to the transient accumulation of ROS what was diminished  
341 by higher activity of ROS scavenging enzymes.
- 342 3. Stress-induced agents combined with higher auxin concentration led to  
343 the formation of stem-like cells that demonstrated low ROS levels with  
344 low levels of antioxidant machinery that may suggest the existence of  
345 the non-canonical way of protection against stress agents as a transition  
346 to stem-like cells.

# 347 Appendix A. Supplemental Figures

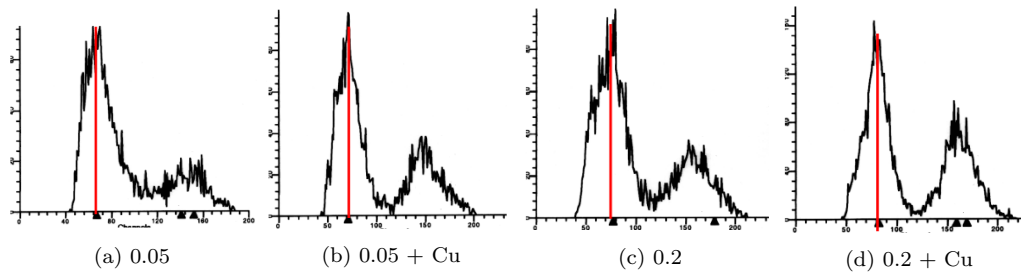

Figure A.7: Flow cytometry histogram after 96 hours in culture.

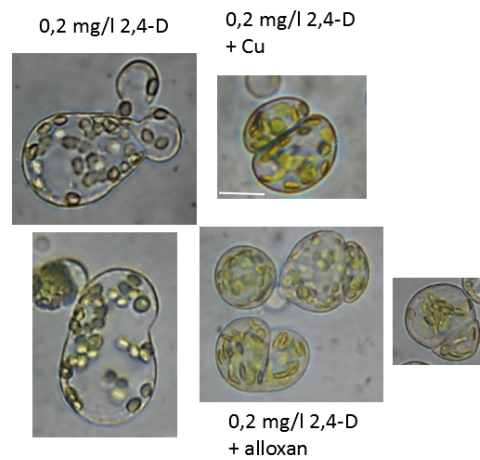

Figure A.8: Cells morphology after 96 hours in culture. Scale bar- 10  $\mu\text{m}$ .



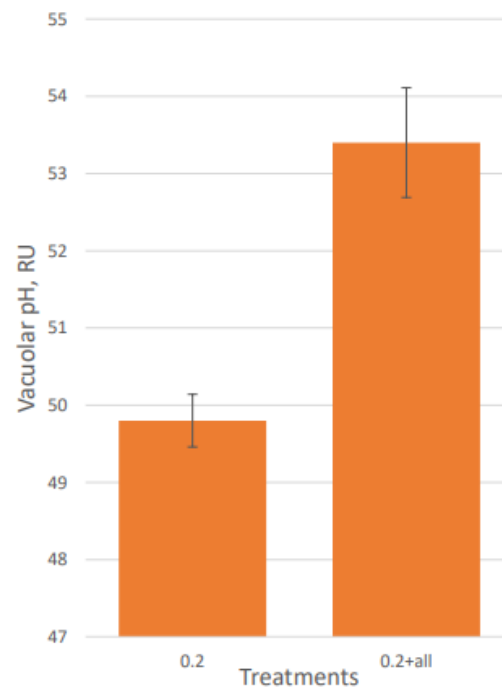

Figure A.9: Vacuolar pH

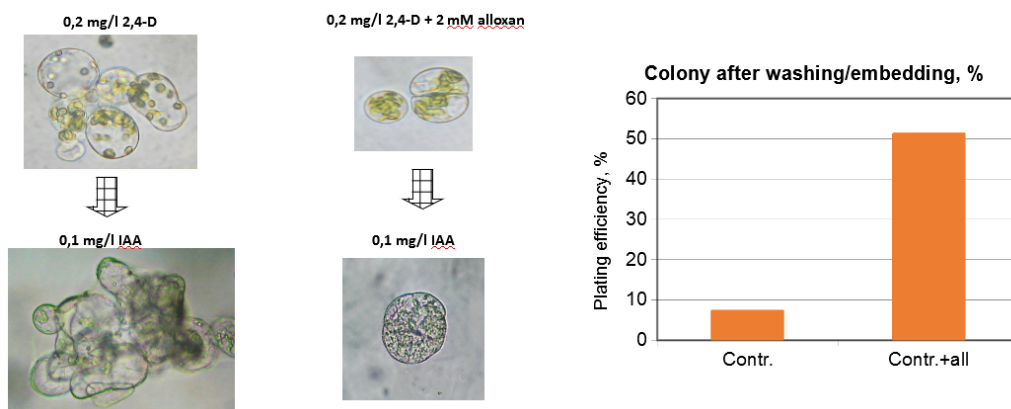

Figure A.10: Auxin-independency of protoplasts-derived colony.

## References

- [1] K. Das, A. Roychoudhury, Reactive oxygen species (ROS) and response of antioxidants as ROS-scavengers during environmental stress in plants, *Frontiers in Environmental Science* 2 (2014).
- [2] M. Redza-Dutordoir, D. A. Averill-Bates, Activation of apoptosis signalling pathways by reactive oxygen species, *Biochimica et Biophysica Acta (BBA) - Molecular Cell Research* 1863 (2016) 2977–2992.
- [3] T. Pasternak, K. Lystvan, A. Betekhtin, R. Hasterok, From single cell to plants: Mesophyll protoplasts as a versatile system for investigating plant cell reprogramming, *International Journal of Molecular Sciences* 21 (2020) 4195.
- [4] R. Mittler, ROS are good, *Trends in Plant Science* 22 (2017) 11–19.
- [5] T. P. Pasternak, K. Ötvös, M. Domoki, A. Fehér, Linked activation of cell division and oxidative stress defense in alfalfa leaf protoplast-derived cells is dependent on exogenous auxin, *Plant Growth Regulation* 51 (2006) 109–117.
- [6] A. Feher, K. Ötvös, T. P. Pasternak, A. Pettkó-Szandtner, The involvement of reactive oxygen species (ROS) in the cell cycle activation (g0-to-g1transition) of plant cells, *Plant Signaling & Behavior* 3 (2008) 823–826.
- [7] G. Zhou, S. Meng, Y. Li, Y. T. Ghebre, J. P. Cooke, Optimal ROS signaling is critical for nuclear reprogramming, *Cell Reports* 15 (2016) 919–925.
- [8] T. P. Pasternak, E. Prinsen, F. Ayaydin, P. Miskolczi, G. Potters, H. Asard, H. A. V. Onckelen, D. Dudits, A. Fehér, The role of auxin, pH, and stress in the activation of embryogenic cell division in leaf protoplast-derived cells of alfalfa, *Plant Physiology* 129 (2002) 1807–1819.
- [9] K. Ötvös, T. P. Pasternak, P. Miskolczi, M. Domoki, D. Dorjgotov, A. Szűcs, S. Bottka, D. Dudits, A. Fehér, Nitric oxide is required for, and promotes auxin-mediated activation of, cell division and embryogenic

- 379 cell formation but does not influence cell cycle progression in alfalfa cell  
380 cultures, *The Plant Journal* 43 (2005) 849–860.
- 381 [10] R. A. Festa, D. J. Thiele, Copper: An essential metal in biology, *Current*  
382 *Biology* 21 (2011) R877–R883.
- 383 [11] K. A. Koch, M. M. O. Peña, D. J. Thiele, Copper-binding motifs in  
384 catalysis, transport, detoxification and signaling, *Chemistry & Biology*  
385 4 (1997) 549–560.
- 386 [12] R. Shingles, L. E. Wimmers, R. E. McCarty, Copper transport across  
387 pea thylakoid membranes, *Plant Physiology* 135 (2004) 145–151.
- 388 [13] N. Attar, O. A. Campos, M. Vogelauer, C. Cheng, Y. Xue,  
389 S. Schmollinger, L. Salwinski, N. V. Mallipeddi, B. A. Boone, L. Yen,  
390 S. Yang, S. Zikovich, J. Dardine, M. F. Carey, S. S. Merchant, S. K.  
391 Kurdistan, The histone h3-h4 tetramer is a copper reductase enzyme,  
392 *Science* 369 (2020) 59–64.
- 393 [14] D. R. Hoagland, D. Arnon, The water-culture method for growing plants  
394 without soil.
- 395 [15] S. J. Conn, B. Hocking, M. Dayod, B. Xu, A. Athman, S. Henderson,  
396 L. Aukett, V. Conn, M. K. Shearer, S. Fuentes, S. D. Tyerman, M. Gilli-  
397 ham, Protocol: optimising hydroponic growth systems for nutritional  
398 and physiological analysis of arabidopsis thaliana and other plants, *Plant*  
399 *Methods* 9 (2013) 4.
- 400 [16] E. Muszyńska, M. Labudda, Dual role of metallic trace elements in stress  
401 biology—from negative to beneficial impact on plants, *International*  
402 *Journal of Molecular Sciences* 20 (2019) 3117.
- 403 [17] P. WOJTASZEK, Oxidative burst: an early plant response to pathogen  
404 infection, *Biochemical Journal* 322 (1997) 681–692.
- 405 [18] T. Raeymaekers, G. Potters, H. Asard, Y. Guisez, N. Horemans,  
406 Copper-mediated oxidative burst in nicotiana tabacum l. cv. bright yel-  
407 low 2 cell suspension cultures, *Protoplasma* 221 (2003) 93–100.

- 408 [19] S. Mitra, T. Keswani, M. Dey, S. Bhattacharya, S. Sarkar, S. Goswami,  
409 N. Ghosh, A. Dutta, A. Bhattacharyya, Copper-induced immunotoxi-  
410 city involves cell cycle arrest and cell death in the spleen and thymus,  
411 Toxicology 293 (2012) 78–88.
- 412 [20] T. Keswani, S. Mitra, A. Bhattacharyya, Copper-induced immunotoxi-  
413 city involves cell cycle arrest and cell death in the liver, Environmental  
414 Toxicology 30 (2013) 411–421.
- 415 [21] R. Qin, C. Wang, D. Chen, L. O. Björn, S. Li, Copper-induced root  
416 growth inhibition of *Allium cepavar.agrogarum*L. involves disturbances  
417 in cell division and DNA damage, Environmental Toxicology and Chem-  
418 istry 34 (2015) 1045–1055.
- 419 [22] H. Lequeux, C. Hermans, S. Lutts, N. Verbruggen, Response to copper  
420 excess in *arabidopsis thaliana*: Impact on the root system architecture,  
421 hormone distribution, lignin accumulation and mineral profile, Plant  
422 Physiology and Biochemistry 48 (2010) 673–682.
- 423 [23] N. Takasu, I. Komiya, T. Asawa, Y. Nagasawa, T. Yamada,  
424 Streptozocin- and alloxan-induced h<sub>2</sub>O<sub>2</sub> generation and DNA fragmen-  
425 tation in pancreatic islets: H<sub>2</sub>O<sub>2</sub> as mediator for DNA fragmentation,  
426 Diabetes 40 (1991) 1141–1145.
- 427 [24] M. P. Washburn, W. W. Wells, Glutathione dependent reduction of  
428 alloxan to dialuric acid catalyzed by thioltransferase (glutaredoxin): A  
429 possible role for thioltransferase in alloxan toxicity, Free Radical Biology  
430 and Medicine 23 (1997) 563–570.
- 431 [25] T. Pasternak, G. Potters, R. Caubergs, M. A. K. Jansen, Comple-  
432 mentary interactions between oxidative stress and auxins control plant  
433 growth responses at plant, organ, and cellular level, Journal of Experi-  
434 mental Botany 56 (2005) 1991–2001.
- 435 [26] D. P. Marin, A. P. Bolin, R. de Cássia Santos Macedo, S. C. Sampaio,  
436 R. Otton, ROS production in neutrophils from alloxan-induced diabetic  
437 rats treated in vivo with astaxanthin, International Immunopharmacol-  
438 ogy 11 (2011) 103–109.
- 439 [27] F. Cheng, Alloxan, American Cancer Society, pp. 1–2.

- 440 [28] J.-P. Reichheld, T. Vernoux, F. Lardon, M. V. Montagu, D. Inzé, Specific checkpoints regulate plant cell cycle progression in response to oxidative stress, *The Plant Journal* 17 (1999) 647–656.
- 441
- 442
- 443 [29] S. Vanneste, D. Inzé, T. Beeckman, Auxin Fuels the Cell Cycle Engine during Lateral Root Initiation, *American Cancer Society*, pp. 187–202.
- 444
- 445 [30] C. J. Baker, N. M. Mock, An improved method for monitoring cell death in cell suspension and leaf disc assays using evans blue, *Plant Cell, Tissue and Organ Culture* 39 (1994) 7–12.
- 446
- 447
- 448 [31] T. Pasternak, P. Miskolczi, F. Ayaydin, T. Mészáros, D. Dudits, A. Fehér, *Plant Growth Regulation* 32 (2000) 129–141.
- 449
- 450 [32] D. W. GALBRAITH, K. R. HARKINS, J. M. MADDOX, N. M. AYRES, D. P. SHARMA, E. FIROOZABADY, Rapid flow cytometric analysis of the cell cycle in intact plant tissues, *Science* 220 (1983) 1049–1051.
- 451
- 452
- 453 [33] Purification of ascorbate peroxidase in spinach chloroplasts its inactivation in ascorbate-depleted medium and reactivation by monodehydroascorbate radical, *Plant and Cell Physiology* (1987).
- 454
- 455
- 456 [34] D. Gossett, E. Millhollon, M. Lucas, S. Banks, M.-M. Marney, The effects of NaCl on antioxidant enzyme activities in callus tissue of salt-tolerant and salt-sensitive cotton cultivars (*Gossypium hirsutum* L.), *Plant Cell Reports* 13 (1994).
- 457
- 458
- 459
- 460 [35] F. Van Breusegem, E. Vranová, J. F. Dat, D. Inzé, The role of active oxygen species in plant signal transduction, *Plant Science* 161 (2001) 405–414.
- 461
- 462
- 463 [36] Abstract, ????
- 464 [37] T. Nomura, M. Itouga, M. Kojima, Y. Kato, H. Sakakibara, S. Hasezawa, Copper mediates auxin signalling to control cell differentiation in the copper moss *Scopelophila cataractae*, *Journal of Experimental Botany* 66 (2014) 1205–1213.
- 465
- 466
- 467
- 468 [38] S. L. Klemm, Z. Shipony, W. J. Greenleaf, Chromatin accessibility and the regulatory epigenome, *Nature Reviews Genetics* 20 (2019) 207–220.
- 469

- 470 [39] S. Reckova, J. Tuma, P. Dobrev, R. Vankova, Influence of copper on  
471 hormone content and selected morphological, physiological and biochem-  
472 ical parameters of hydroponically grown zea mays plants, Plant Growth  
473 Regulation 89 (2019) 191–201.
- 474 [40] R. Mittler, Oxidative stress, antioxidants and stress tolerance, Trends  
475 in Plant Science 7 (2002) 405–410.
- 476 [41] G. E. Miner, K. D. Sullivan, C. Zhang, L. R. Hurst, M. L. Starr, D. A.  
477 Rivera-Kohr, B. C. Jones, A. Guo, R. A. Fratti, Copper blocks v-ATPase  
478 activity and SNARE complex formation to inhibit yeast vacuole fusion,  
479 Traffic 20 (2019) 841–850.
- 480 [42] A. de Marco, K. A. Roubelakis-Angelakis, The complexity of enzymic  
481 control of hydrogen peroxide concentration may affect the regeneration  
482 potential of plant protoplasts, Plant Physiology 110 (1996) 137–145.
- 483 [43] A. K. Papadakis, C. I. Siminis, K. A. Roubelakis-Angelakis, Reduced ac-  
484 tivity of antioxidant machinery is correlated with suppression of totipo-  
485 tency in plant protoplasts, Plant Physiology 126 (2001) 434–444.
